# Supplementary material for: Potassium-promoted Ru-MCM-41 catalyst via in situ loading for effective low-temperature ammonia decomposition
Source: Royal Society of Chemistry journal article supplement (doi:10.1039/d3nj05953g), 2024-01-01
Supplement: d3nj05953g1.pdf [file d3nj05953g1.pdf]

## Potassium-promoted Ru-MCM-41 catalyst via in situ loading for effective low-temperature ammonia decomposition

*Jingwei Yang, Xiaodong Zhao, Xun Qi, Jie Wen\*, Hui Zhang\**

College of Chemistry and Chemical Engineering Southwest Petroleum University,  
Chengdu 610500, China.

Corresponding Author:

E-mail: huizhang@swpu.edu.cn. (H Zhang)

wenjie@swpu.edu.cn. (J Wen)

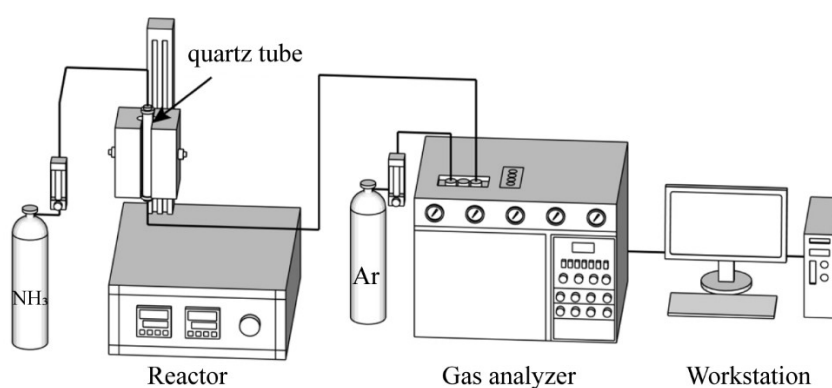

**Fig. S1 Ammonia decomposition to hydrogen performance test setup**

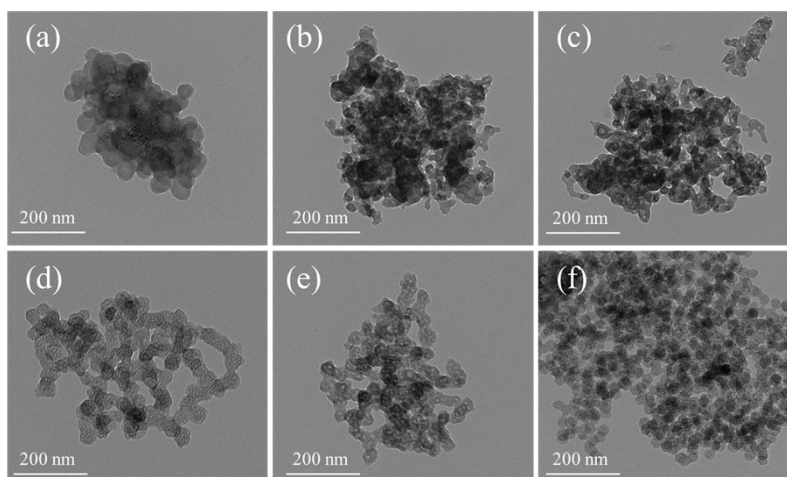

**Fig. S2 TEM images of K-nRu-MCM-41 catalysts, (a) to (f) represent catalysts  
with n from 0 to 5, respectively**

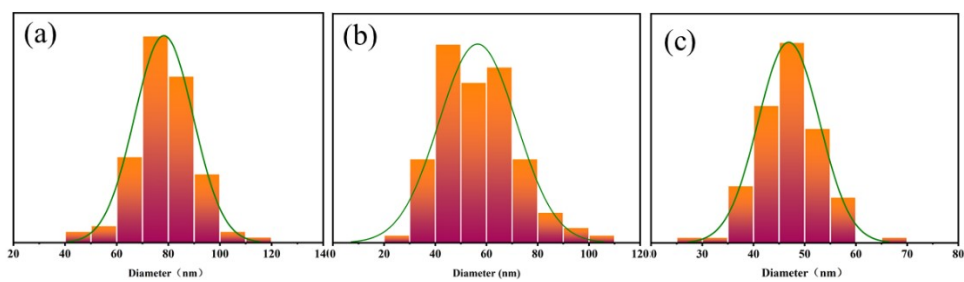

**Figure S3 Particle size distribution of MCM-41 (a), 4Ru-MCM-41 (b) and K-4Ru-MCM-41 (c) catalysts**
